# Supplementary material for: Redox mediators for oxygen reduction reactions in lithium–oxygen batteries: governing kinetics and its implications
Source: Royal Society of Chemistry journal article supplement (doi:10.1039/d3ee02880a), 2023-01-01
Supplement: d3ee02880a1.pdf [file d3ee02880a1.pdf]

## Supplementary Information

### Table of contents

|                                                                                                                                                      |
|------------------------------------------------------------------------------------------------------------------------------------------------------|
| <b>Materials and Methods</b>                                                                                                                         |
| <b>Supplementary Figures</b>                                                                                                                         |
| <b>Figure S1.</b> Cyclic voltammetry profiles of quinones                                                                                            |
| <b>Figure S2.</b> Schematics showing the reactions occurring at the rotating ring disk electrode                                                     |
| <b>Figure S3.</b> Linear sweep voltammetry profile with rotating ring disk electrode                                                                 |
| <b>Figure S4.</b> Linear sweep voltammetry profile with rotating disk electrode                                                                      |
| <b>Figure S5.</b> Plot of (rotating speed, $\omega$ ) <sup>-1/2</sup> vs. (current, $i$ ) <sup>-1</sup> at various overpotentials and linear fitting |
| <b>Figure S6.</b> SEM images of electrode before and after discharge without a quinone                                                               |
| <b>Figure S7.</b> X-ray diffraction pattern collected from electrodes discharged with quinone-containing electrolytes                                |
| <b>Figure S8.</b> SEM images of electrodes discharged with PBQ                                                                                       |
| <b>Figure S9.</b> SEM images of electrodes discharged with quinones in group 3                                                                       |
| <b>Supplementary Tables</b>                                                                                                                          |
| <b>Table S1.</b> Redox potential of quinones obtained from cyclic voltammetry.                                                                       |
| <b>Table S2.</b> Apparent rate constant for homogeneous electron transfer ( $k_{app}$ ) calculated from RRDE experiment                              |
| <b>Table S3.</b> Diffusivity of quinones calculated from rotating disk electrode experiment                                                          |
| <b>Table S4.</b> Heterogeneous electron transfer rate constant for quinones calculated from the rotating disk electrode experiment                   |
| <b>Table S5.</b> Discharge capacity from lithium-oxygen cells discharged with quinone-containing electrolytes                                        |
| <b>Supplementary Notes</b>                                                                                                                           |
| <b>Supplement note 1.</b> Collection efficiency of rotating ring disk electrode experiment                                                           |
| <b>Supplement note 2.</b> Measurement of diffusivity and heterogeneous electron transfer rate constant using rotating disk electrode                 |

## Materials and Methods

### Material preparation

The tetraethylene glycol dimethyl ether (TEGDME,  $\geq 99\%$ , Sigma-Aldrich) used as an organic solvent for the electrolyte was dried for more than 2 days with a molecular sieve (type 3Å, Sigma-Aldrich). Bis(trifluoromethane)sulfonimide lithium salt (LiTFSI,  $> 99.95\%$ ) was purchased from Sigma-Aldrich. It was dried for more than 2 days at 180 °C under vacuum. Benzoquinone derivatives, methyl-p-benzoquinone (98%), 2,5-dimethyl-1,4-benzoquinone ( $\geq 98\%$ ), duroquinone (97%), thymoquinone ( $\geq 98\%$ ), 2-tert-butyl-1,4-benzoquinone (98%), 2,5-di-tert-butyl-1,4-benzoquinone (99%), 2,6-di-tert-butyl-1,4-benzoquinone (98%), 2,5-di-tert-octyl-1,4-benzoquinone, and 2,5-dichloro-1,4-benzoquinone (98%) were purchased from Sigma-Aldrich and used as received. 2-Phenyl-1,4-benzoquinone ( $\geq 96\%$ ) and 2,3,5-trimethyl-1,4-benzoquinone ( $\geq 98\%$ ) were purchased from Tokyo Chemical Industry, and 2,5-di-phenyl-1,4-benzoquinone was purchased from Santa Cruz Biotechnology. The quinones were used as received. 1 M LiTFSI was dissolved in TEGDME solvent to produce a quinone-free electrolyte. The quinone-containing electrolytes were made by additionally dissolving 1 or 10 mM of each quinone. The final water content of all the electrolytes was confirmed to be less than 50 ppm by Karl Fischer titration. Before being used as an air electrode, the gas diffusion layer (H23, Freudenberg) was heat-treated at 900 °C for 3 h in an Ar:H<sub>2</sub> (95:5 volume ratio) atmosphere. A lithium iron phosphate (LFP) electrode was fabricated by coating slurry on Al foil. The slurry was prepared by mixing LFP powder, polyvinylidene fluoride, and super P with a weight ratio of 90:7:3 into 1-methyl-2-pyrrolidinone. Before being used as a separator, glass fiber (GF/D, Whatman) was washed with acetone and dried at 70 °C under vacuum for more than a day.

### Lithium–oxygen cell assembly

A Swagelok-type cell was used to construct the lithium–oxygen cell. A sheet of gas diffusion layer was used as the air electrode. A sheet of glass fiber and a LFP electrode were used as the separator and counter electrode, respectively. The air electrode, separator, and counter electrode were prepared to have diameters of 1/2 inch. The amount of electrolyte used in assembling the cells was 200  $\mu\text{L}$ . After cell assembly in an Ar-filled glove box ( $\text{O}_2$  level < 0.1 ppm and  $\text{H}_2\text{O}$  level < 0.1 ppm), the atmosphere of the empty space above the air electrode was transformed to  $\text{O}_2$  (> 99.999%), and the cells were operated as closed.

### **Electrochemical analysis and characterization**

For the cyclic voltammetry experiment, a three-electrode beaker cell was used. A gold electrode and platinum wire were used as the working and counter electrode, respectively. For the reference electrode, 0.01 M  $\text{Ag}/\text{Ag}^+$  in acetonitrile was used. For the linear sweep voltammetry analysis, a glassy carbon rotating disk electrode and rotating ring disk electrode with glassy carbon disk and Pt ring (PINE research) were used as the working electrodes, and the same counter and reference electrode as those used in the cycling voltammetry experiment were used. To rotate the electrodes, a rotator (PINE research, AFMSRCE) was employed. For the cyclic voltammetry and galvanostatic discharge experiments, a potentiostat (WonA Tech, WBCS 3000) was employed. For the linear sweep voltammetry experiment with a RDE and RRDE, a bi-potentiostat (Biologics, VSP-300) was employed. To calculate the diffusivity and heterogeneous electron transfer rate from the RDE profile, the kinematic viscosity was measured by a viscometer (Cannon–Fenske Routine Viscometer, Cannon Instrument Company). For observation of the electrode surface, field-emission scanning electron microscopy (SUPRA 55VP, Carl Zeiss) was used. The characterization of discharged electrode was conducted using X-ray diffraction (D2 phaser, Bruker).

## Supplementary Figures

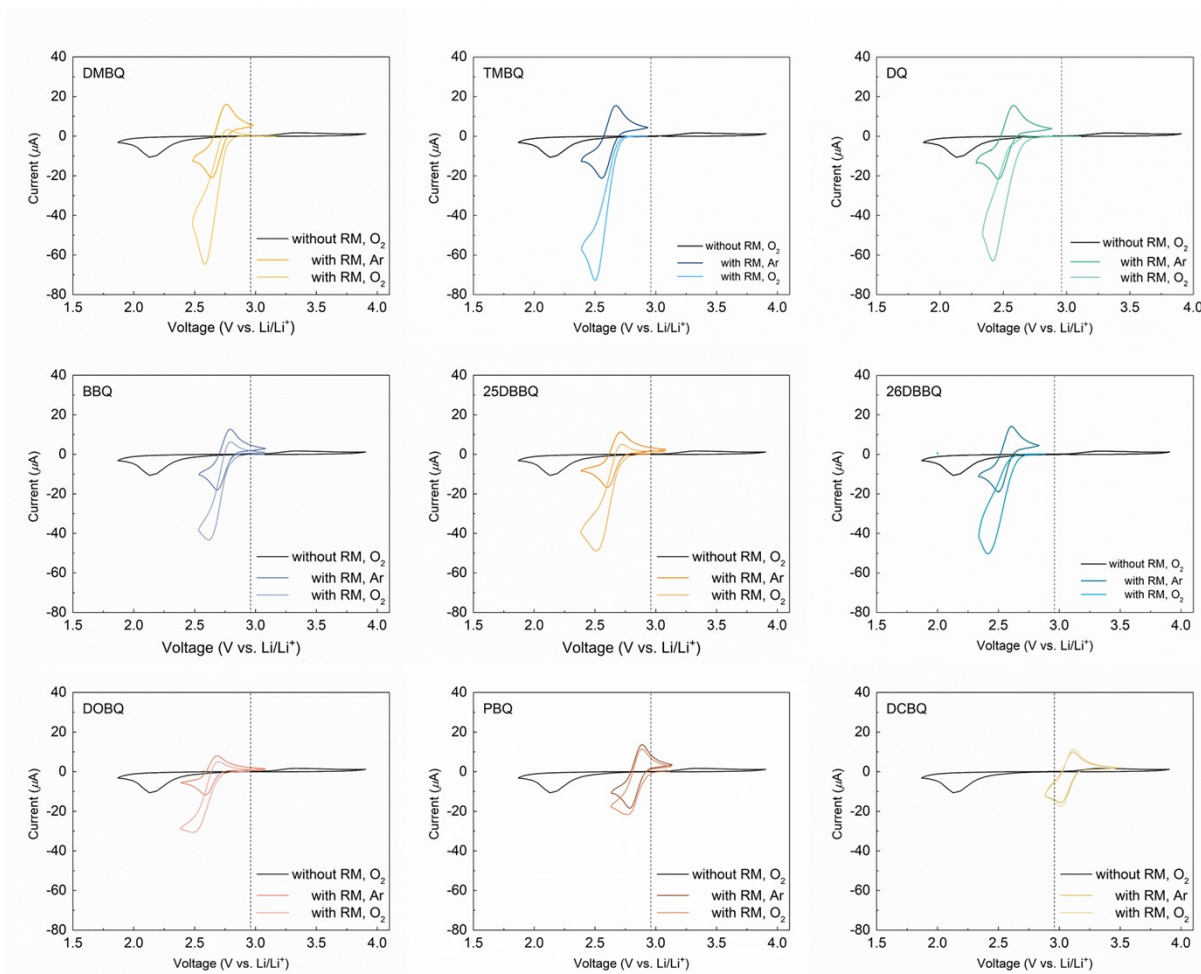

**Figure S1.** Cyclic voltammetry profiles of quinones. 1 M LiTFSI TEGDME with 10 mM of each quinone was used as an electrolyte and the scan rate of  $50 \text{ mV s}^{-1}$  were used to collect profiles.

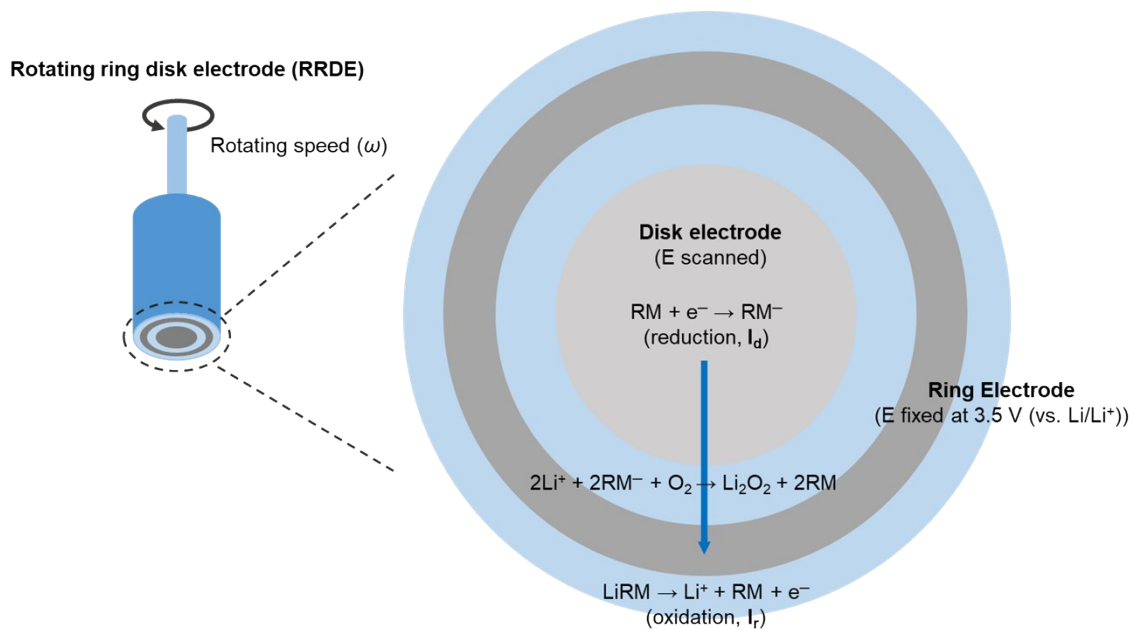

**Figure S2.** Schematics showing the reactions occurring at the rotating ring disk electrode (RRDE). At the disk electrode, RMs are reduced to generate disk current. Then they drift out to the ring electrode, where the reduced RMs are oxidized to generate ring current.

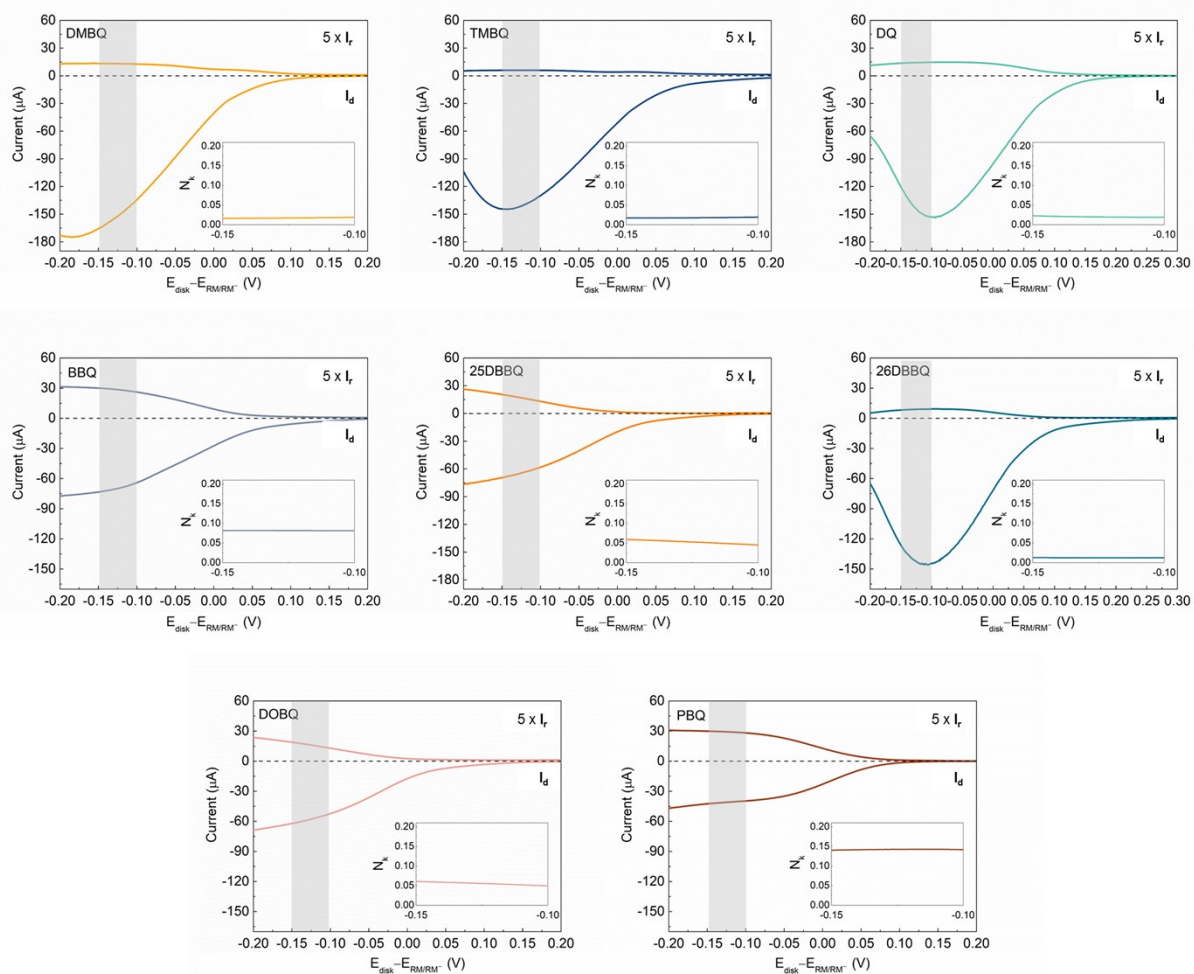

**Figure S3.** Linear sweep voltammetry profile with rotating ring disk electrode (RRDE). 1 M LiTFSI TEGDME containing 1 mM of each quinone was used as an electrolyte. The potential of disk electrode was scanned at the scan rate of  $10 \text{ mV s}^{-1}$ . Electrode was rotated with 2000 rpm. The ring current ( $I_r$ ), disk current ( $I_d$ ), and kinetic collection efficiency ( $N_k$ ,  $I_r/I_d$ ) are plotted.

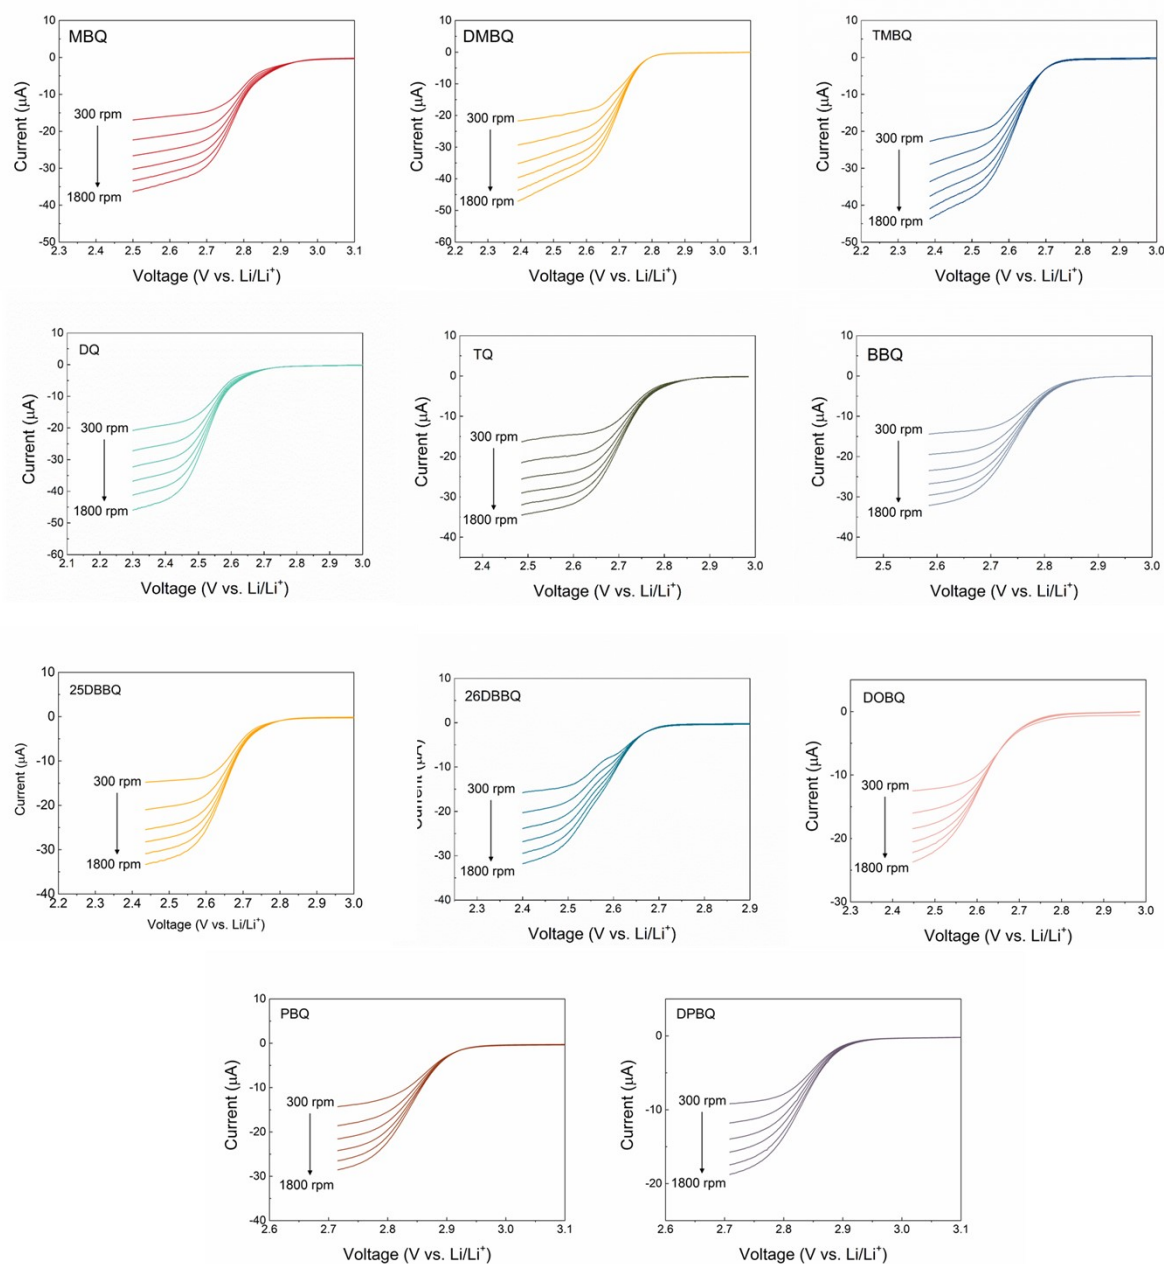

**Figure S4.** Linear sweep voltammetry profile with rotating disk electrode (RDE) at various rotating speeds from 300 rpm to 1800 rpm. 1 M LiTFSI TEGDME with 1 mM of quinone was used as an electrolyte and a scan rate of  $10 \text{ mV s}^{-1}$  were used.

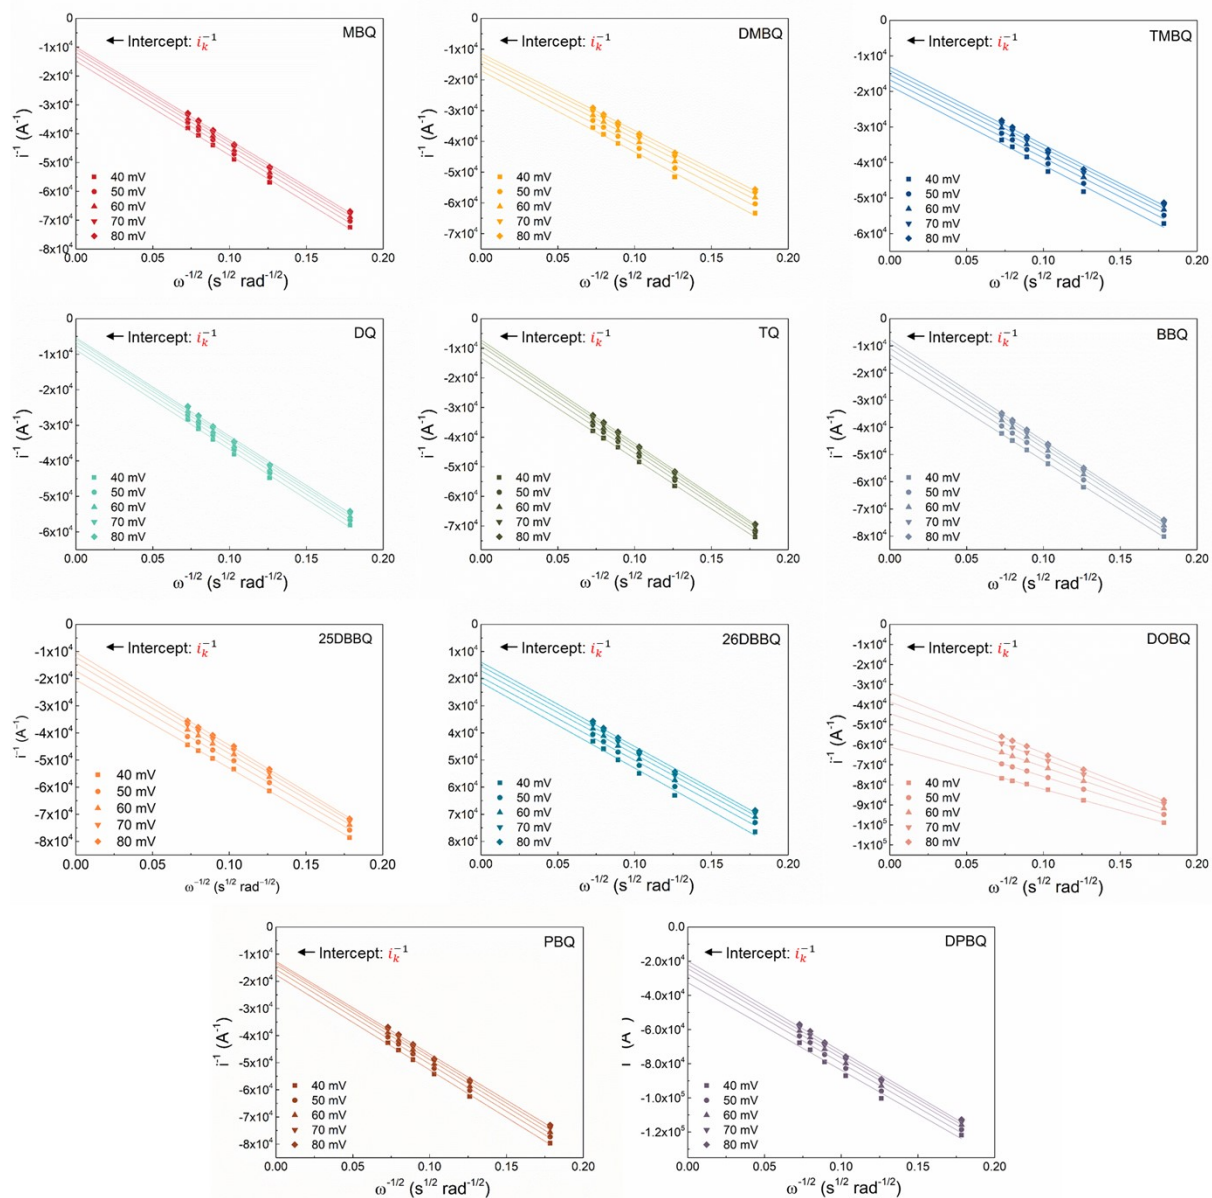

**Figure S5.** Plot of (rotating speed,  $\omega$ )<sup>-1/2</sup> vs. (current,  $i$ )<sup>-1</sup> at various overpotentials and linear fitting lines whose y-intercept indicates  $i_k^{-1}$ .



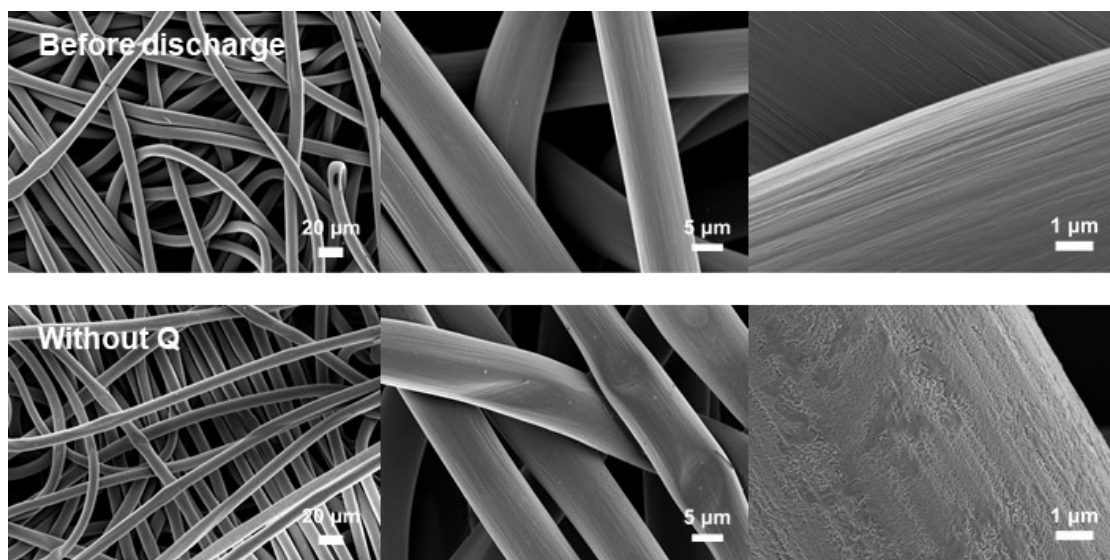

**Figure S6.** SEM images of electrode before (top) and after (bottom) discharge without a quinone. The surface of the electrode discharged without the quinone was passivated by a film-like discharge product.

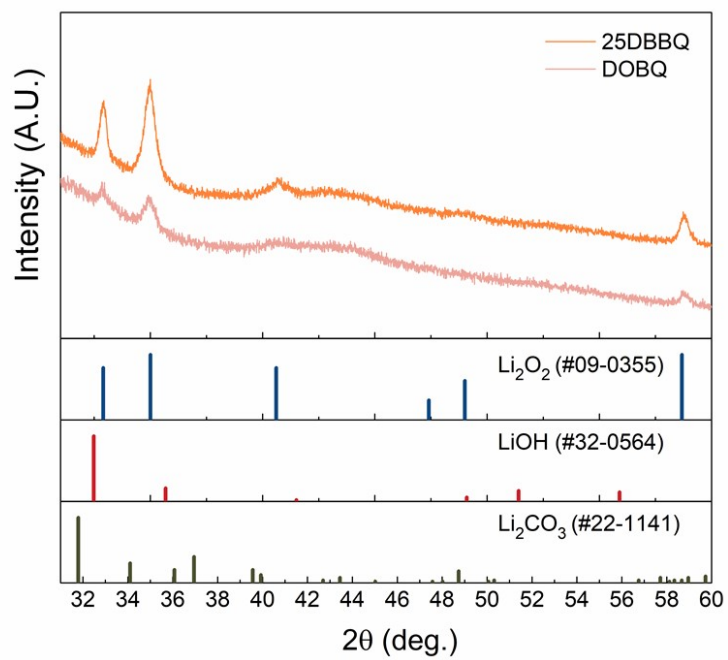

**Figure S7.** X-ray diffraction pattern collected from electrodes discharged with quinone-containing electrolytes confirming that the toroidal discharge product is lithium peroxide,  $\text{Li}_2\text{O}_2$ .

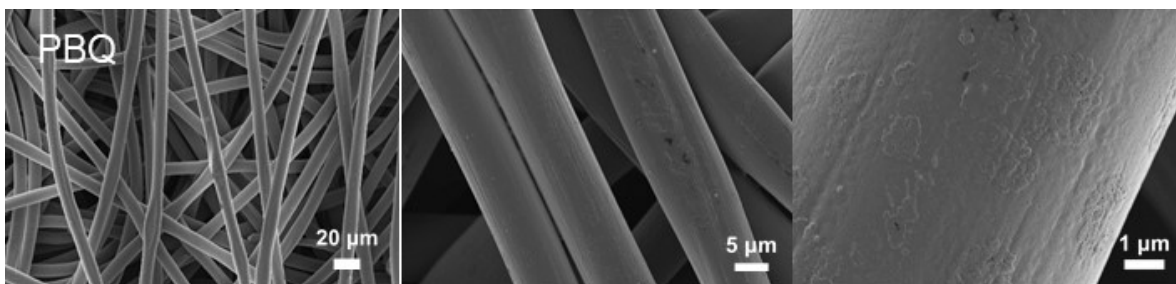

**Figure S8.** SEM images of electrodes discharged with PBQ. The low-magnification SEM images do not show much difference from the quinone-free case shown in figure S6. A higher magnification image shows that the formation of toroidal discharge products is limited leading to electrode passivation failing to achieve high discharge capacity.

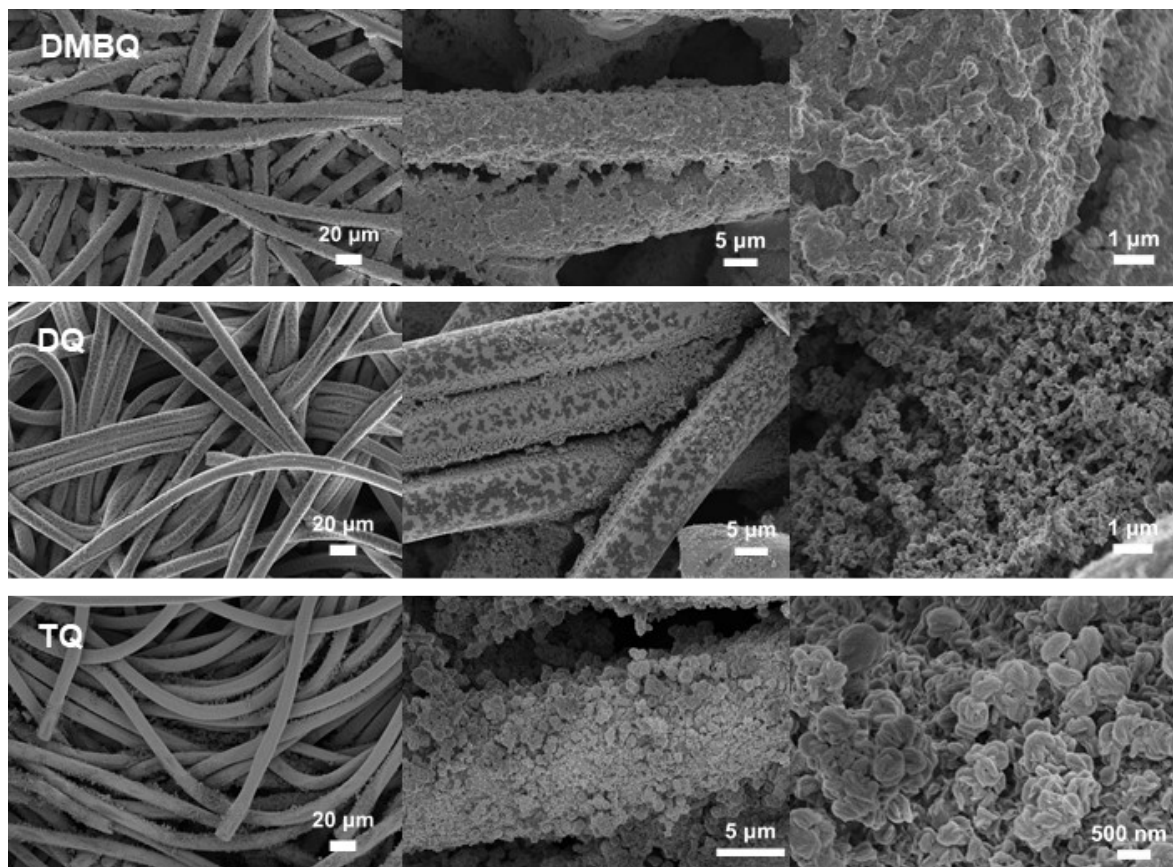

**Figure S9.** SEM images of electrodes discharged with quinones in group 3, DMBQ, DQ, and TQ. In all cases, the formation of the toroidal discharge product was observed, confirming catalytic effect of quinones. However, quinones also induce the passivation of electrode by toroidal discharge product, leading to limited discharge capacity.

## Supplementary Tables

**Table S1.** Redox potential of quinones obtained from cyclic voltammetry.

| Species | $E_{RM/RM^-}$<br>(V vs. Li/Li <sup>+</sup> ) | Species | $E_{RM/RM^-}$<br>(V vs. Li/Li <sup>+</sup> ) |
|---------|----------------------------------------------|---------|----------------------------------------------|
| MBQ     | 2.765                                        | 25DBBQ  | 2.658                                        |
| DMBQ    | 2.698                                        | 26DBBQ  | 2.565                                        |
| TMBQ    | 2.610                                        | DOBQ    | 2.639                                        |
| DQ      | 2.513                                        | PBQ     | 2.832                                        |
| TQ      | 2.696                                        | DPBQ    | 2.830                                        |
| BBQ     | 2.748                                        | DCBQ    | 3.065                                        |

**Table S2.** Apparent rate constant for homogeneous electron transfer ( $k_{app}$ ) calculated from RRDE experiment.

| Species | Homogeneous electron transfer<br>apparent rate constant, $k_{app}$ ( $s^{-1}$ ) |                       |                       | Average | Standard<br>deviation |
|---------|---------------------------------------------------------------------------------|-----------------------|-----------------------|---------|-----------------------|
|         | 1 <sup>st</sup> trial                                                           | 2 <sup>nd</sup> trial | 3 <sup>rd</sup> trial |         |                       |
| MBQ     | 0.196                                                                           | 0.187                 | 0.187                 | 0.190   | 0.00416               |
| DMBQ    | 0.919                                                                           | 0.904                 | 0.910                 | 0.911   | 0.00609               |
| TMBQ    | 1.149                                                                           | 1.168                 | 1.173                 | 1.163   | 0.0106                |
| DQ      | 1.058                                                                           | 1.077                 | 1.073                 | 1.069   | 0.00810               |
| TQ      | 0.930                                                                           | 0.921                 | 0.915                 | 0.922   | 0.00631               |
| BBQ     | 0.503                                                                           | 0.497                 | 0.485                 | 0.495   | 0.00765               |
| 25DBBQ  | 0.772                                                                           | 0.647                 | 0.710                 | 0.710   | 0.0508                |
| 26DBBQ  | 1.024                                                                           | 1.025                 | 1.028                 | 1.026   | 0.00176               |
| DOBQ    | 0.592                                                                           | 0.405                 | 0.499                 | 0.461   | 0.0929                |
| PBQ     | 0.0133                                                                          | 0.0648                | 0.0109                | 0.0297  | 0.0249                |
| DPBQ    | 0.039                                                                           | 0.062                 | 0.018                 | 0.040   | 0.0179                |

**Table S3.** Diffusivity of quinones calculated from rotating disk electrode (RDE) experiment.

| Species | Diffusivity (cm <sup>2</sup> s <sup>-1</sup> ) |                       |                       | Average  | Standard deviation |
|---------|------------------------------------------------|-----------------------|-----------------------|----------|--------------------|
|         | 1 <sup>st</sup> trial                          | 2 <sup>nd</sup> trial | 3 <sup>rd</sup> trial |          |                    |
| MBQ     | 2.72E-06                                       | 2.82E-06              | 2.66E-06              | 2.74E-06 | 6.82E-08           |
| DMBQ    | 1.12E-06                                       | 1.16E-06              | 1.49E-06              | 1.26E-06 | 1.66E-07           |
| TMBQ    | 1.78E-06                                       | 1.74E-06              | 1.69E-06              | 1.74E-06 | 3.82E-08           |
| DQ      | 1.65E-06                                       | 1.67E-06              | 1.91E-06              | 1.74E-06 | 1.16E-07           |
| TQ      | 1.38E-06                                       | 1.46E-06              | 1.26E-06              | 1.36E-06 | 8.16E-08           |
| BBQ     | 1.54E-06                                       | 1.57E-06              | 1.59E-06              | 1.57E-06 | 2.32E-08           |
| 25DBBQ  | 1.35E-06                                       | 1.42E-06              | 1.40E-06              | 1.39E-06 | 2.82E-08           |
| 26DBBQ  | 1.24E-06                                       | 1.30E-06              | 1.30E-06              | 1.28E-06 | 2.56E-08           |
| DOBQ    | 9.14E-07                                       | 9.33E-07              | 9.74E-07              | 9.40E-07 | 2.53E-08           |
| PBQ     | 1.62E-06                                       | 1.54E-06              | 1.48E-06              | 1.55E-06 | 5.71E-08           |
| DPBQ    | 7.80E-07                                       | 7.37E-07              | 9.08E-07              | 8.09E-07 | 7.28E-08           |

**Table S4.** Heterogeneous electron transfer rate constant for quinones calculated from the rotating disk electrode (RDE) experiment.

| Species | Heterogeneous electron transfer rate constant, $k_0$ (cm s <sup>-1</sup> ) |                       |                       | Average  | Standard deviation |
|---------|----------------------------------------------------------------------------|-----------------------|-----------------------|----------|--------------------|
|         | 1 <sup>st</sup> trial                                                      | 2 <sup>nd</sup> trial | 3 <sup>rd</sup> trial |          |                    |
| MBQ     | 3.82E-03                                                                   | 3.92E-03              | 3.73E-03              | 3.82E-03 | 8.13E-05           |
| DMBQ    | 3.63E-03                                                                   | 3.87E-03              | 4.68E-03              | 4.06E-03 | 4.51E-04           |
| TMBQ    | 3.48E-03                                                                   | 3.67E-03              | 3.71E-03              | 3.62E-03 | 1.01E-04           |
| DQ      | 4.71E-03                                                                   | 5.23E-03              | 7.20E-03              | 5.71E-03 | 1.07E-04           |
| TQ      | 3.60E-03                                                                   | 4.07E-03              | 3.76E-03              | 3.81E-03 | 1.94E-04           |
| BBQ     | 3.43E-03                                                                   | 2.95E-03              | 2.55E-03              | 2.98E-03 | 3.58E-04           |
| 25DBBQ  | 1.90E-03                                                                   | 1.64E-03              | 1.57E-03              | 1.70E-03 | 1.42E-04           |
| 26DBBQ  | 2.98E-03                                                                   | 3.53E-03              | 3.70E-03              | 3.41E-03 | 3.05E-04           |
| DOBQ    | 1.31E-03                                                                   | 1.30E-03              | 1.31E-03              | 1.31E-03 | 3.71E-06           |
| PBQ     | 5.07E-03                                                                   | 4.82E-03              | 4.27E-03              | 4.72E-03 | 3.37E-04           |
| DPBQ    | 1.83E-03                                                                   | 1.78E-03              | 2.02E-03              | 1.88E-03 | 1.07E-04           |



**Table S5.** Discharge capacity from lithium-oxygen cells discharged with quinone-containing electrolytes

| Species | Discharge capacity (mAh cm <sup>-2</sup> ) |                       |                       | Average capacity (mAh cm <sup>-2</sup> ) | Standard deviation |
|---------|--------------------------------------------|-----------------------|-----------------------|------------------------------------------|--------------------|
|         | 1 <sup>st</sup> trial                      | 2 <sup>nd</sup> trial | 3 <sup>rd</sup> trial |                                          |                    |
| MBQ     | 0.098                                      | 0.0786                | 0.0702                | 0.0823                                   | 0.01173            |
| DMBQ    | 0.599                                      | 0.625                 | 0.693                 | 0.639                                    | 0.03972            |
| TMBQ    | 0.688                                      | 0.809                 | 0.664                 | 0.720                                    | 0.06367            |
| DQ      | 0.793                                      | 0.809                 | 0.793                 | 0.798                                    | 0.00764            |
| TQ      | 0.776                                      | 0.849                 | 0.977                 | 0.867                                    | 0.08308            |
| BBQ     | 0.421                                      | 0.407                 | 0.351                 | 0.393                                    | 0.03034            |
| 25DBBQ  | 2.565                                      | 2.585                 | 2.815                 | 2.655                                    | 0.11343            |
| 26DBBQ  | 0.984                                      | 0.595                 | 0.589                 | 0.723                                    | 0.18481            |
| DOBQ    | 1.507                                      | 1.729                 | 1.715                 | 1.651                                    | 0.10142            |
| PBQ     | 0.0484                                     | 0.0449                | 0.0533                | 0.0489                                   | 0.00345            |
| DPBQ    | 0.0291                                     | 0.0362                | 0.0281                | 0.0312                                   | 0.00359            |

## Supplemental note

### Supplement note 1. Collection efficiency of rotating ring disk electrode experiment

On experiment using rotating ring disk electrode, a redox active species is reduced (oxidized) at disk electrode generating disk current,  $I_d$ . Then, a reduced (oxidized) species drifts out to the ring current and oxidized (reduced) to generate ring current,  $I_r$ . By calculating  $I_r/I_d$ , we can quantify the amount of species that is collected at a ring electrode after reacting at a disk electrode. If a reduced (oxidized) species is stable in electrolyte and does not change during diffusion from a disk to a ring, the collection efficiency is only the function of geometric factors of an electrode such as the radius of disk electrode, inner/outer diameter of ring electrode, and gap between two electrodes. Then, we can define theoretical collection efficiency ( $N_{\text{theoretical}}$ ) that does not change with fixed electrode.  $N_{\text{theoretical}}$  of the electrode used in the study was measured using a quinone species under Ar atmosphere. As shown in figure SN1, measure  $N_{\text{theoretical}}$  is 0.144. If reduced species is reactive in electrolyte so that its amount reduces during drifting from a disk to a ring, collection efficiency is measured lower than  $N_{\text{theoretical}}$  and it is defined as kinetic collection efficiency,  $N_k$ .

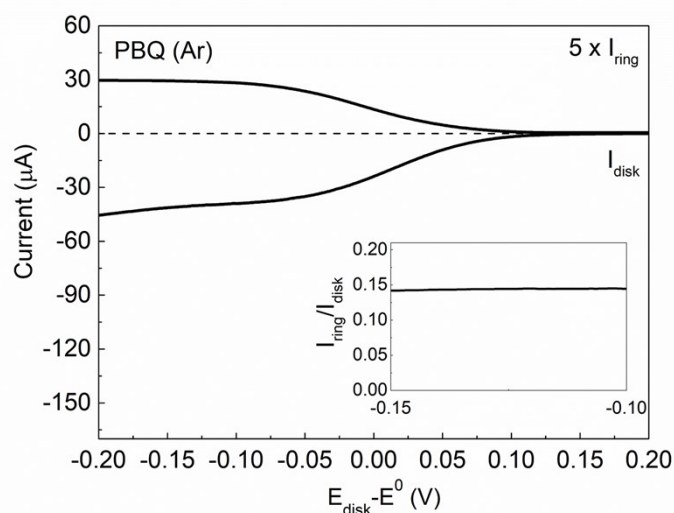

Figure SN1. Linear sweep voltammetry profile with rotating ring disk electrode (RRDE). 1 M LiTFSI TEGDME containing 1 mM of PBQ was used as the electrolyte and a scan rate of  $10 \text{ mV s}^{-1}$  were used. Electrode was rotated with 2000 rpm.  $N_{\text{theoretical}}$ ,  $I_{\text{ring}}/I_{\text{disk}}$  was measured to be 0.144.

## Supplement note 2. Measurement of diffusivity and heterogeneous electron transfer rate constant using rotating disk electrode

The current collected from the linear sweep voltammetry with rotating disk electrodes is expressed as follows according to the Koutecky–Levich equation:

$$\frac{1}{i} = \frac{1}{i_k} + \frac{1}{i_L} \quad \text{- equation 1 (Koutecky–Levich equation)}$$

Here,  $i$  is the total current,  $i_k$  is the kinetic current, and  $i_L$  is the limiting current. According to the equation, when the overpotential is large enough to induce sufficiently high  $i_k$  to make  $\frac{1}{i_k}$  term assumed to be zero,  $i$  remains unchanged and equals  $i_L$ . Therefore, we can obtain  $i_L$  from a linear sweep voltammetry profile in the high overpotential region. Subsequently,  $i_L$  is expressed by the Levich equation as follows:

$$i_L = 0.62nFAD^{2/3}\omega^{1/2}\nu^{-1/6}C_0 \quad \text{- equation 2 (Levich equation)}$$

Here,  $n$  is the number of electrons during the redox reaction,  $F$  is the Faraday constant,  $A$  is the area of the electrode,  $D$  is the diffusivity,  $\omega$  is the rotating speed,  $\nu$  is the kinematic viscosity, and  $C_0$  is the concentration of the redox active species. Here, the plot of  $\omega^{1/2}$  vs.  $i_L$  with various rotating speeds shows a linear relationship with the slope of  $0.62nFAD^{2/3}\nu^{-1/6}C_0$ , which enables calculation of the diffusivity ( $D$ ).

Combining equation 1 and 2 yields the following equation:

$$\frac{1}{i} = \frac{1}{i_k} + \frac{1}{0.62nFAD^{2/3}\omega^{1/2}\nu^{-1/6}C_0} \quad \text{- equation 3}$$

According to equation 3, the plot of  $\frac{1}{i}$  vs.  $\omega^{-1/2}$  follows a linear relationship, yielding a fitting line with a y-intercept of  $\frac{1}{i_k}$ . Once we calculate  $i_k$  at various overpotentials, we can calculate  $i_0$ , the exchange current, by drawing a well-known Tafel plot. Finally,  $i_0$  can be converted into the heterogeneous electron transfer rate constant ( $k_0$ ) using the following simple equation:

$$i_0 = nFAk_0C_0 - \text{equation 4}$$

Figure S4 presents linear sweep voltammetry profile of all quinones studied here under various rotating speeds. According to the Levich equation, the plot of (rotating speed,  $\omega$ )<sup>1/2</sup> vs. (limiting current,  $i_L$ ) has a linear relationship with a slope related to the diffusivity. Plots of  $\omega$ <sup>1/2</sup> vs.  $i_L$  and linear fitting lines for all the quinones are presented in Figure SN2a.

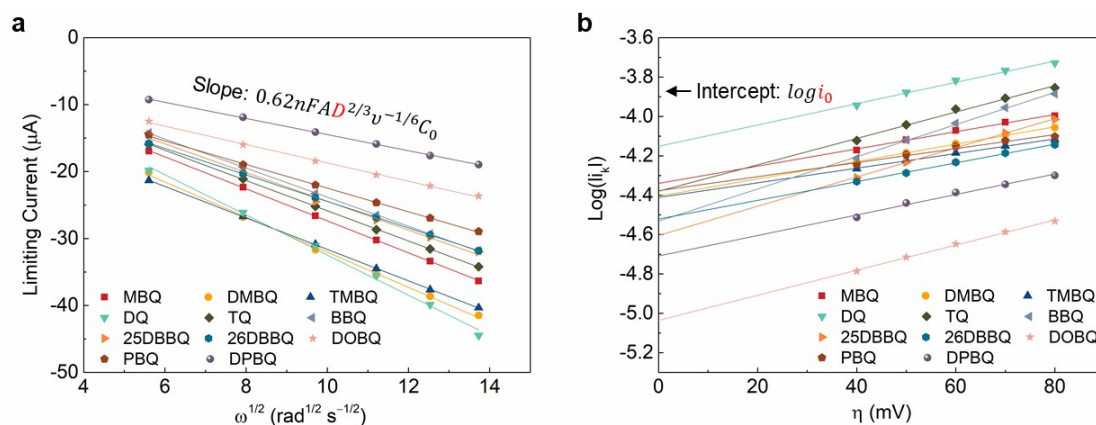

Figure SN2. a. Plot of (rotating speed)<sup>1/2</sup> vs. limiting current and linear fitting line. The diffusivity can be calculated from the slope of the fitting line, b. Plot of overpotential vs.  $\text{log}(i_k)$  and linear fitting line whose y-intercept indicates  $\text{log}(i_0)$ .

The diffusivity for each quinone was calculated from the slope of the fitting line, and the values are listed in Table S3. The variables used to calculate diffusivity are as follows:  $A$  is 0.196 cm<sup>2</sup>,  $v$  is 0.1 cm<sup>2</sup> s<sup>-1</sup>, and  $C_0$  is 1 mM. The other kinetic parameter,  $k_0$ , was also measured using the Koutecký–Levich equation. According to this equation, the kinetic current ( $i_k$ ) is given by the y-intercept of a linear fitting line of the plot of  $\omega^{-1/2}$  vs.  $i^{-1}$ . Figure S5 presents a plot of  $\omega^{-1/2}$  vs.  $i^{-1}$  at various overpotentials ( $\eta$ ) for all quinones. Finally, we calculated  $k_0$  as the y-intercept of the linear fitting in the Tafel plot ( $\eta$  vs.  $\text{log}(i_k)$ ), as shown in Figure SN2b. The calculated  $k_0$  values are listed in Table S4.
